# Supplementary material for: Coupling conversion of methane with carbon monoxide via carbonylation over Zn/HZSM-5 catalysts
Source: Royal Society of Chemistry journal article supplement (doi:10.1039/d0cy01983f), 2020-11-30
Supplement: d0cy01983f1.pdf [file d0cy01983f1.pdf]

## Supporting information

### **Coupling Conversion of methane with Carbon Monoxide via carbonylation over Zn/HZSM-5 catalyst**

Fuli Wen<sup>a,b,c</sup>, Jin Zhang<sup>a,b,c</sup>, Zhiyang Chen<sup>a,b,c</sup>, Ziqiao Zhou<sup>a,b,c</sup>, Hongchao Liu<sup>a,b,\*</sup>, Wenliang Zhu<sup>a,b,\*</sup>, Zhongmin Liu<sup>a,b,c</sup>

<sup>a</sup> National Engineering Laboratory for Methanol to Olefins, Dalian Institute of Chemical Physics, Chinese Academy of Sciences, Dalian 116023, China.

<sup>b</sup> Dalian National Laboratory for Clean Energy, Dalian Institute of Chemical Physics, Chinese Academy of Sciences, Dalian 116023, China.

<sup>c</sup> University of Chinese Academy of Sciences, Beijing 100049, China.

\*Correspondence and requests for materials should be addressed to Hongchao Liu (chliu@dicp.ac.cn) or Wenliang Zhu (wlzhu@dicp.ac.cn).

### **Catalyst preparation**

The catalysts were prepared by incipient wetness impregnation. Typically, 1.365g  $\text{Zn}(\text{NO}_3)_2 \cdot 6\text{H}_2\text{O}$  (Tian jin da mao) was dissolved in 5g deionized water, then 5g HZSM-5( $\text{SiO}_2/\text{Al}_2\text{O}_3=40.7$ , NanKai University) was introduced into the solution. Incipient overnight at atmosphere temperature, then dried 2h at 120°C, and calcined in muffle at 550°C for 4 h.

### **NMR Spectroscopy**

All the solid-state NMR experiments were performed on a Bruker Avance III 600 spectrometer equipped with a 14.1T wide-bore magnet using a 4mm MAS probe.<sup>13</sup>C CP/MAS NMR spectra recorded using cross polarization sequence with a spinning rate of 12 kHz.

### **Catalyst test**

The prepared catalyst was tested on a high-pressure fixed bed reactor, with a liner made of quartz inside the stainless steel tube. Typically, 0.4g of catalyst was putting in the reactor, pretreated in He at 350°C for 2h and increasing to reaction temperature for 30min. After the pretreatment, the reaction gas with a composition of 10% methane, 80% carbon monoxide, and 10% argon as the standard was introduced to the reactor. The reaction products were analyzed by an online gas chromatograph (Agilent 7890B) equipped with a Plot-Q capillary column connected to a flame ionization detector(FID) to detect the hydrocarbons of methane, ethane, ethylene,  $\text{C}_3$ , benzene and toluene, HP-5 capillary column connected to another FID to detect the aromatics such as BTX, naphthalene, methylnaphthalene and  $\text{C}_{11+}$  aromatics; besides, a TDX-1 packed column connected to a thermal conductivity detector(TCD) to detect the Ar, CO,  $\text{CH}_4$  and  $\text{CO}_2$ .

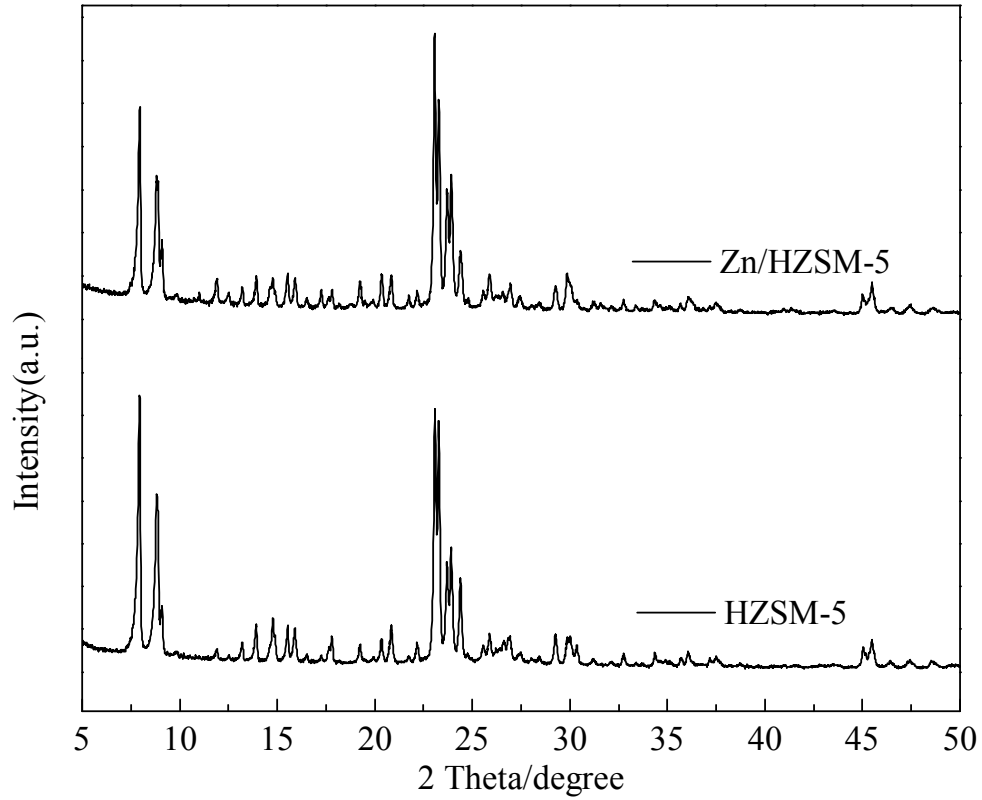

**Fig S1.** Powder XRD pattern of the HZSM-5 and corresponding Zn/HZSM-5  
Introducing of 6%Zn has no effect of the crystal structure of HZSM-5, and ZnO peak was not found in XRD pattern.

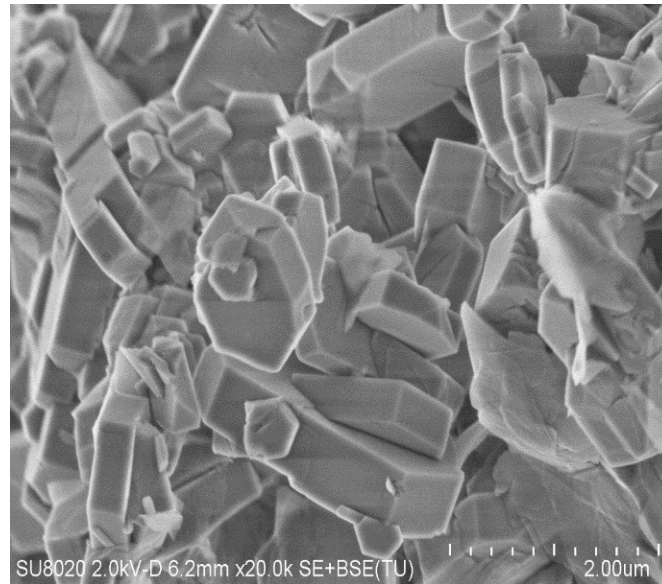

**Figure S2.** SEM images of HZSM-5.

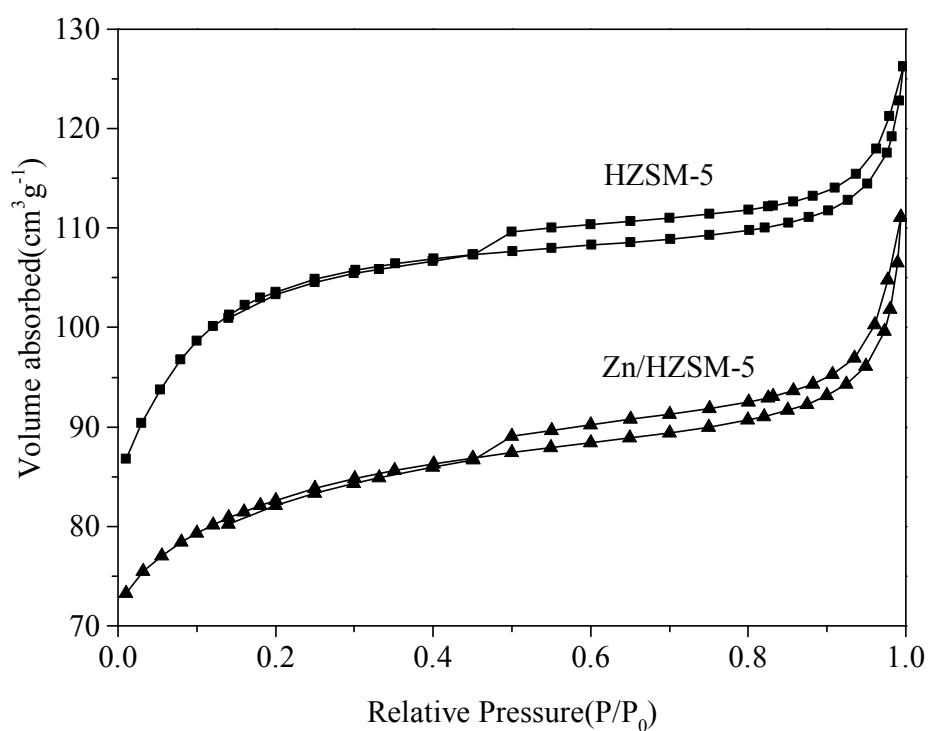

**Fig S3.** N<sub>2</sub> adsorption-desorption isotherms of the HZSM-5 and corresponding Zn/HZSM-5

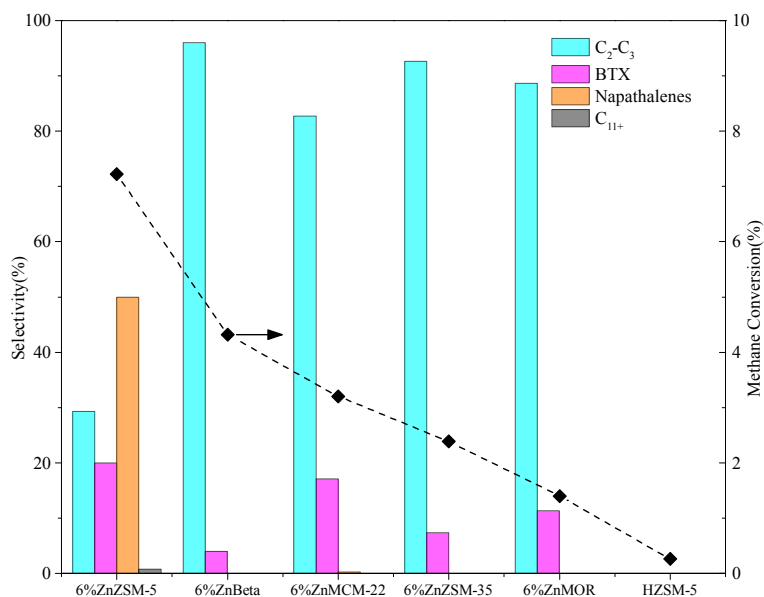

**Fig S4.** The conversion of methane and the hydrocarbons selectivity on Zn-Zeolite with different topology structure

Reaction conditions: T=773 K, P=2.0 Mpa, CO/CH<sub>4</sub>/Ar=8:1:1, space velocity=2250 ml/g<sub>cat</sub>·h, time on stream=30 min

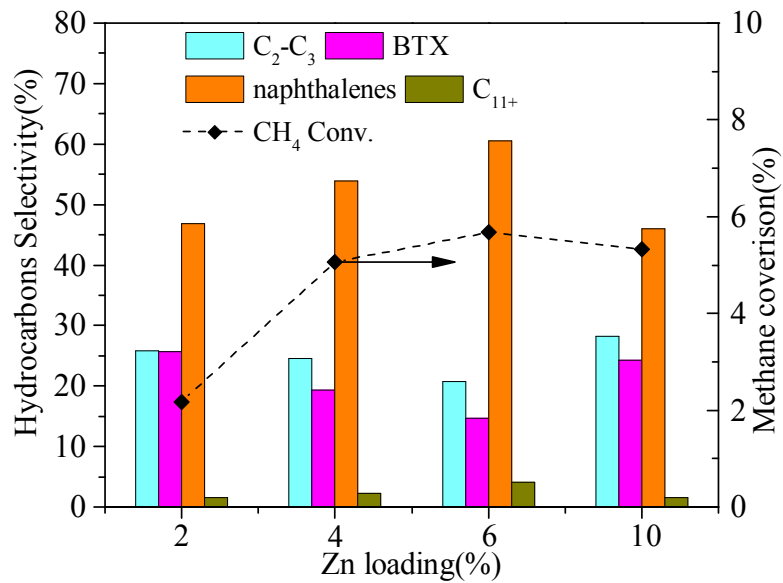

**Fig S5.** The hydrocarbons selectivity and methane conversion on Zn/HZSM-5 catalyst with different Zn content  
 Reaction conditions: T=773 K, P=2.0 Mpa, CO/CH<sub>4</sub>/Ar=8:1:1, space velocity=4500 ml/g<sub>cat</sub>·h, time on stream=30 min

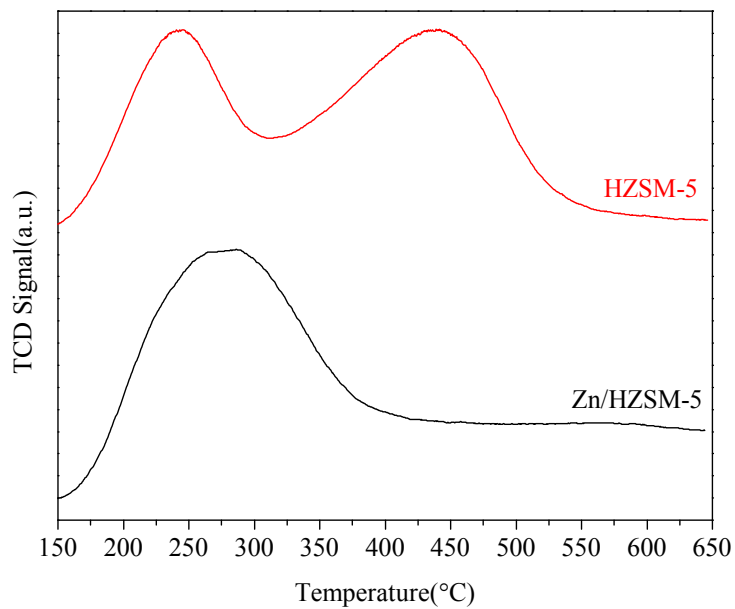

**Fig S6.** NH<sub>3</sub>-TPD of HZSM-5 and corresponding Zn/HZSM-5

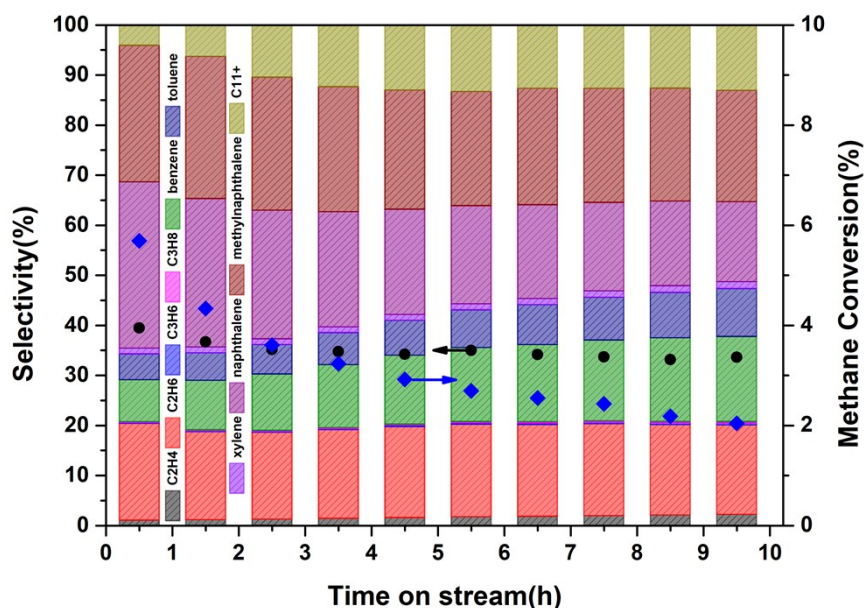

**Fig S7.** The time on stream of methane conversion (diamond), the selectivity of different hydrocarbons and carbon dioxide (circle).

Reaction conditions: 6%Zn/HZSM-5, Temperature=773 K, Pressure=2.0 MPa, space velocity=4500 mL/g<sub>cat</sub>·h, CO/CH<sub>4</sub>/Ar=8:1:1

**Table S1.** The products of the co-reaction of CO and methane on Zn/HZSM-5

| CO/CH <sub>4</sub> [mol ratio] |                    | 0: 1 <sup>[a]</sup> | 1: 1  | 8: 1  |
|--------------------------------|--------------------|---------------------|-------|-------|
| Methane conversion(%)          |                    | 0.28                | 1.84  | 5.68  |
| Hydrocarbons<br>Selectivity[%] | ethylene           | -                   | 2.75  | 1.08  |
|                                | ethane             | -                   | 34.86 | 19.36 |
|                                | C <sub>3</sub>     | -                   | 0.60  | 0.34  |
|                                | benzene            | -                   | 17.32 | 8.37  |
|                                | toluene            | -                   | 5.33  | 5.15  |
|                                | xylene             | -                   | 0     | 1.16  |
|                                | naphthalene        | -                   | 20.78 | 33.20 |
|                                | methyl naphthalene | -                   | 8.20  | 27.29 |
| C <sub>11+</sub> aromatics     | -                  | 10.14               | 4.03  |       |

Reaction condition: 6%Zn/H-ZSM-5, Temperature=773 K, Pressure=2.0 MPa, space velocity=4500 mL/g<sub>cat</sub>·h, CO/CH<sub>4</sub>/Ar=8:1:1, Time on stream=30 min

[a]: without CO

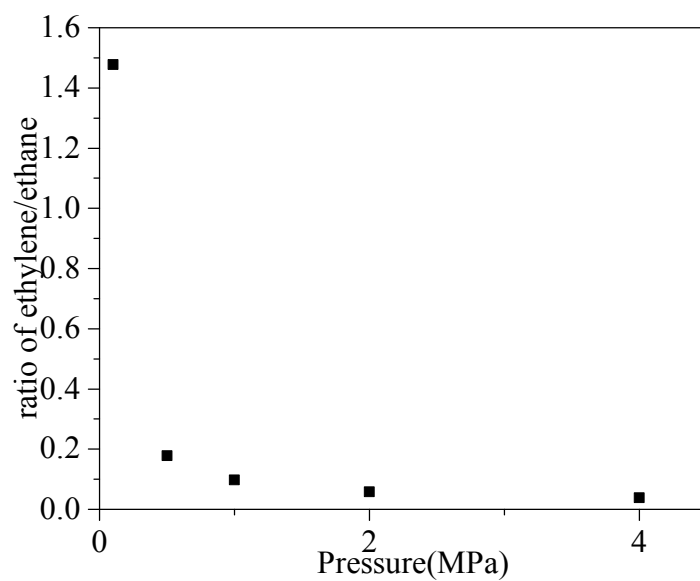

**Figure S8.** The ratio of ethylene/ethane at different reaction pressure  
Reaction conditions:  $T=773\text{ K}$ ,  $\text{CO/CH}_4/\text{Ar}=8:1:1$ , space velocity= $4500\text{ ml/g}_{\text{cat}}\cdot\text{h}$ ,  
time on stream= $30\text{ min}$

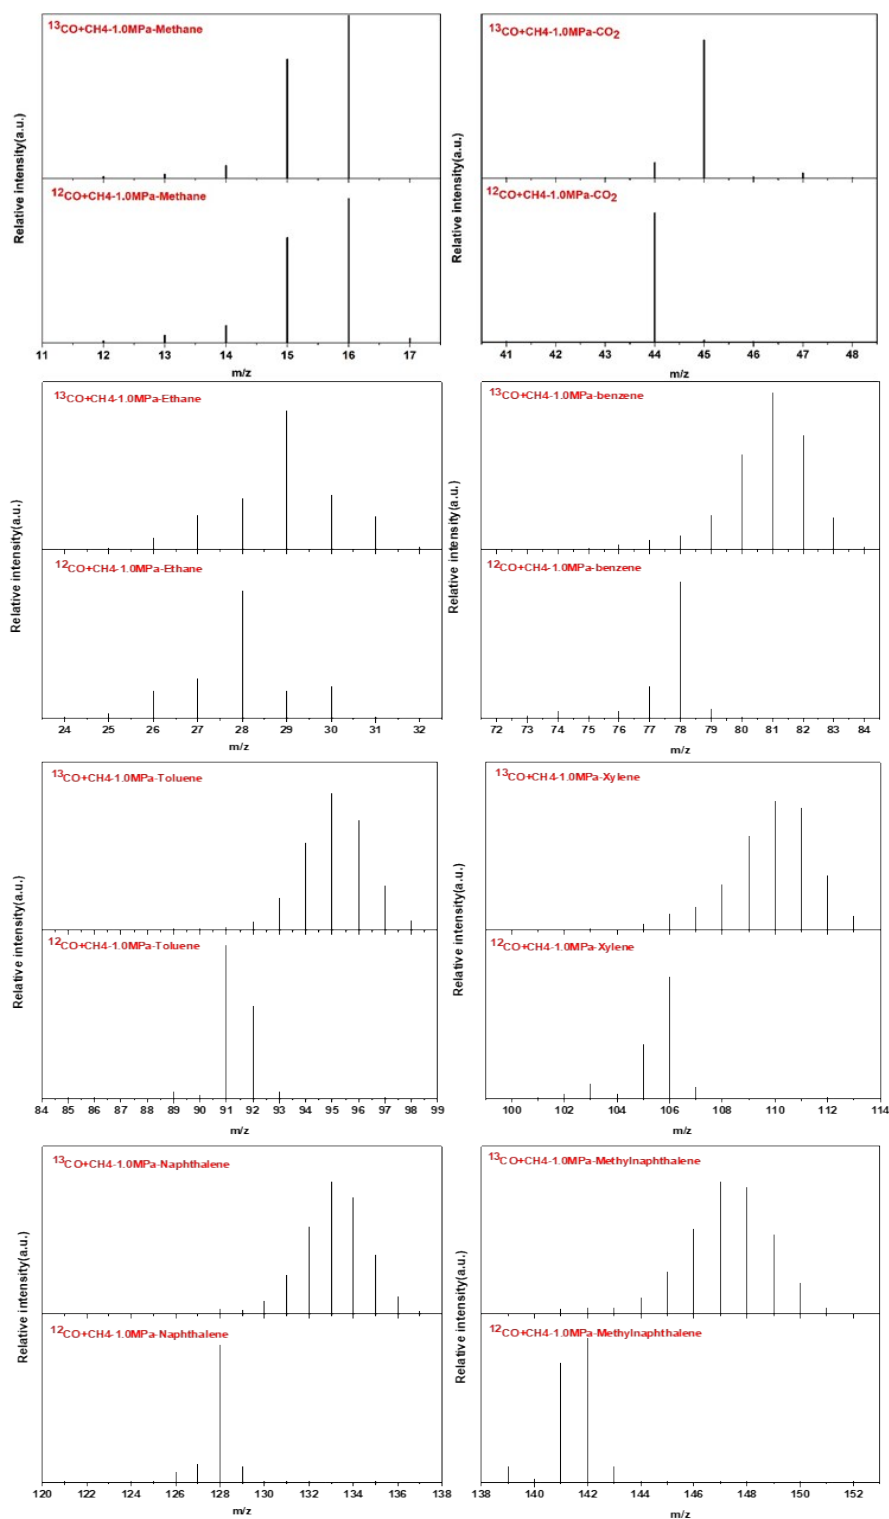

**Fig S9.** MS spectra of ethane, benzene, toluene, xylene, naphthalene and methylnaphthalene from different feeds ( $^{12}\text{C}$ O (bottom) and  $^{13}\text{C}$ O (top)) during the  $\text{CH}_4$ -CO reaction.

Reaction conditions: catalyst weight, 0.15 g;  $T=773\text{ K}$ ;  $P=1.0\text{ MPa}$   $\text{CO}/\text{CH}_4/\text{Ar}=8:1:1$  space velocity= $3000\text{ mL}/\text{g}_{\text{cat}}\cdot\text{h}$  reaction time= $60\text{ min}$
